# Supplementary material for: Dislocation creep near the frictional-viscous transition in blueschist: experimental constraints
Source: Copernicus journal article supplement (doi:10.5194/egusphere-2024-1507), 2024-05-29
Supplement: Supplementary file 2 [file egusphere-2024-1507-supplement.zip]

Archive with 4 entries (4 files):
- Supp_Mat_Hufford_et_al_2024/Supp_Mat_Hufford_et_al_2024_Document.pdf
- Supp_Mat_Hufford_et_al_2024/Table_S1_StrainRateStepping_Pbcorrections.xlsx
- Supp_Mat_Hufford_et_al_2024/Table_S2_Mechanical_Data_With_Without_Pb_Corrections.xlsx
- Supp_Mat_Hufford_et_al_2024/Table_S3_EBSD_Polishing_Parameters.xlsx
