# Supplementary material for: Dislocation creep near the frictional-viscous transition in blueschist: experimental constraints
Source: Copernicus journal article supplement (doi:10.5194/egusphere-2024-1507), 2024-05-29
Supplement: Supplementary file 2 [file egusphere-2024-1507-supplement.zip › Supp_Mat_Hufford_et_al_2024/Table_S1_StrainRateStepping_Pbcorrections.xlsx]

## Sheet: LH042 (700C)
				Run-In Strain Rate
				5.4e-06
	Step #	Stress_original (MPa)	SR	Stress_Pb_corrected (Mpa)
	1	385	5.4e-06	385
	2	546	1.9e-05	544
	3	465	1.4e-05	464			Add
	4	373	6.9e-06	373			(above reference rate)
	5	309	4e-06	311			8	5.4e-07
	6	280	2.3e-06	285			7	1.1475e-06
							6	1.755e-06
							5	2.3625e-06
							4	2.97e-06
							3	3.5775e-06
							2	4.185e-06
							1	4.7925e-06
							0	5.4e-06
							Subtract
							(below reference rate)
							0	5.4e-06
							1	1.1475e-05
							2	1.755e-05
							3	2.3625e-05
							4	2.97e-05
							5	3.5775e-05
							6	4.185e-05
							7	4.7925e-05
							8	5.4e-05

## Sheet: LH095 (725C)
				Run-In Strain Rate
				1.5e-05
	Step #	Stress_original (MPa)	SR	Stress_Pb_corrected (Mpa)
	1	421	1.5e-05	421
	2	538	3.9e-05	537
	3	260	7.1e-06	264			Add
	4	656	3.7e-05	655			(above reference rate)
							8	1.5e-06
							7	3.1875e-06
							6	4.875e-06
							5	6.5625e-06
							4	8.25e-06
							3	9.9375e-06
							2	1.1625e-05
							1	1.33125e-05
							0	1.5e-05
							Subtract
							(below reference rate)
							0	1.5e-05
							1	3.1875e-05
							2	4.875e-05
							3	6.5625e-05
							4	8.25e-05
							5	9.9375e-05
							6	0.00011625
							7	0.000133125
							8	0.00015

## Sheet: LH045 (750C)
				Run-In Strain Rate
				2.1e-05
	Step #	Stress_original (MPa)	SR	Stress_Pb_corrected (Mpa)
	1	285	2.1x10-5	285
	2	380	5.5x10-5	379
	3	100	2.7x10-6	107
	4	226	1.1x10-5	230
							Add
							(above reference rate)
							8	2.1e-06
							7	4.4625e-06
							6	6.825e-06
							5	9.1875e-06
							4	1.155e-05
							3	1.39125e-05
							2	1.6275e-05
							1	1.86375e-05
							0	2.1e-05
							Subtract
							(below reference rate)
							0	2.1e-05
							1	4.4625e-05
							2	6.825e-05
							3	9.1875e-05
							4	0.0001155
							5	0.000139125
							6	0.00016275
							7	0.000186375
							8	0.00021
