# Supplementary material for: Dislocation creep near the frictional-viscous transition in blueschist: experimental constraints
Source: Copernicus journal article supplement (doi:10.5194/egusphere-2024-1507), 2024-05-29
Supplement: Supplementary file 2 [file egusphere-2024-1507-supplement.zip › Supp_Mat_Hufford_et_al_2024/Table_S2_Mechanical_Data_With_Without_Pb_Corrections.xlsx]

## Sheet: Sheet1
	Sample ID	Shear Stress (MPa)	Shear Stress Pb Corrected (MPa)	Equivalent Stress (MPa)	Equivalent Stress Pb Corrected (MPa)	Shear Strain Rate (s-1)	Equivalent Strain Rate (s-1)
	LH042a	192	192	384	384	9.3e-06	5.36936e-06
	b	273	271	546	544	3.4e-05	1.96299e-05
	c	233	232	466	465	2.4e-05	1.38564e-05
	d	186	186	372	372	1.2e-05	6.9282e-06
	e	154	156	308	310	6.9e-06	3.98372e-06
	f	140	145	280	285	4e-06	2.3094e-06
	LH045a	142	142	284	284	3.7e-05	2.1362e-05
	b	190	189	380	379	9.6e-05	5.54256e-05
	c	50	57	100	107	4.7e-06	2.71355e-06
	d	113	117	226	230	2e-05	1.1547e-05
	LH095a	210	210	420	420	2.7e-05	1.55885e-05
	b	269	268	538	537	6.7e-05	3.86825e-05
	c	130	134	260	264	1.2e-05	6.9282e-06
	d	328	327	656	655	6.3e-05	3.63731e-05
