# Supplementary material for: Dislocation creep near the frictional-viscous transition in blueschist: experimental constraints
Source: Copernicus journal article supplement (doi:10.5194/egusphere-2024-1507), 2024-05-29
Supplement: Supplementary file 2 [file egusphere-2024-1507-supplement.zip › Supp_Mat_Hufford_et_al_2024/Table_S3_EBSD_Polishing_Parameters.xlsx]

## Sheet: Sheet1
Grain Size	Substrate	Pressure (N)	Time (minutes)
9	Hard plastic	30	4
3	Satin woven acetate, medium resilience	25	3
1	Satin woven natural silk, medium resilience	20	2
0.25	Synthetic short nap, very high resilience	15	1
Colloidal silica	Porous neoprene, high resilience	15	5
